# Supplementary material for: Effectiveness of Acupuncture for Pain Control After Cesarean Delivery: A Randomized Clinical Trial
Source: PubMed Central journal article supplement (PMC8886541; doi:10.1001/jamanetworkopen.2022.0517), 2022-02-28
Supplement: jamanetwopen-e220517-s002.pdf [file jamanetwopen-e220517-s002.pdf]

## Supplementary Online Content

Usichenko TI, Henkel BJ, Klausenitz C, et al. Effectiveness of acupuncture for pain control after cesarean delivery: a randomized clinical trial. *JAMA Netw Open*. 2022;5(2):e220517. doi:10.1001/jamanetworkopen.2022.0517

**eTable 1.** Missing Data Across the Study Groups and End Points

**eTable 2.** Mobilization and Foley Catheter Removal

This supplementary material has been provided by the authors to give readers additional information about their work.

**eTable 1.** Missing Data Across the Study Groups and Endpoints

| <b>Missing data for following endpoints in each study group, No. (%)</b> | <b>Acupuncture<br/>n=60</b> | <b>Placebo<br/>n=60</b> | <b>Standard care<br/>n=60</b> |
|--------------------------------------------------------------------------|-----------------------------|-------------------------|-------------------------------|
| Maximal pain                                                             | 1 (2)                       | 4 (6)                   | 0                             |
| Minimal pain                                                             | 1 (2)                       | 4 (6)                   | 0                             |
| Pain on movement                                                         |                             |                         |                               |
| first postoperative day                                                  | 1 (2)                       | 4 (6)                   | 0                             |
| day of discharge                                                         | 2 (4)                       | 5 (8)                   | 2 (3)                         |
| Pain disturbed various items of life quality                             | 2 (4)                       | 5 (8)                   | 4 (6)                         |
| Analgesics requirement                                                   | 0                           | 0                       | 0                             |
| Analgesia-related side effects                                           | 1 (2)                       | 4 (6)                   | 0                             |
| Satisfaction with pain treatment <sup>a</sup>                            | 2 (4)                       | 5 (8)                   | 2 (3)                         |
| Duration of hospital stay, days <sup>a</sup>                             | 0                           | 2 (4)                   | 0                             |
| Mobilisation on both days                                                | 0                           | 0                       | 0                             |
| Foley catheter removed                                                   | 0                           | 1 (2)                   | 0                             |

**eTable 2.** Mobilisation and Foley Catheter Removal

| Endpoints                        | Acupuncture Group (AG) n=60 | Placebo Group (PG) n=60 | Standard Care Group (SG) n=60 | AG vs. PG |         | AG vs. SG |         | PG vs. SG |         |
|----------------------------------|-----------------------------|-------------------------|-------------------------------|-----------|---------|-----------|---------|-----------|---------|
|                                  |                             |                         |                               | ES        | P Value | ES        | P Value | ES        | P Value |
| Mobilisation, CS day, No. (%)    |                             |                         |                               |           |         |           |         |           |         |
| none                             | 19 (32)                     | 41 (68)                 | 48 (81)                       | 2.13      | .0003   | 3.58      | < .001  | 1.68      | > .99   |
| sitting up                       | 25 (43)                     | 17 (29)                 | 11 (17)                       | 1.5       | .024    | 2.5       | .024    | 1.7       | .6      |
| standing up                      | 13 (22)                     | 0 (0)                   | 1 (2)                         |           | < .001  |           | .001    |           | > .99   |
| ambulation                       | 3 (5)                       | 2 (3)                   | 0 (0)                         |           |         |           |         |           |         |
| Mobilisation, 1. pO day, No. (%) |                             |                         |                               |           |         |           |         |           |         |
| none                             | 0 (0)                       | 2 (3)                   | 0 (0)                         |           |         |           |         |           |         |
| sitting up                       | 0 (0)                       | 0 (0)                   | 10 (17)                       |           |         |           |         |           |         |
| standing up                      | 1 (2)                       | 9 (15)                  | 15 (25)                       |           |         |           |         |           |         |
| ambulation                       | 59 (98)                     | 49 (83)                 | 35 (58)                       | 1.18      | .012    | 1.69      | < .001  | 1.43      | 0.03    |
| Foley out, No. (%)               |                             |                         |                               |           |         |           |         |           |         |
| CS day                           | 2 (3)                       | 0 (0)                   | 0 (0)                         |           |         |           |         |           |         |
| 1. pO day                        | 55 (93)                     | 43 (72)                 | 42 (70)                       | 1.33      | 0.003   | 1.37      | 0.002   | 1.02      | > .99   |
| 2. pO day                        | 3 (5)                       | 15 (25)                 | 18 (30)                       |           |         |           |         |           |         |

Abbreviations: AG, acupuncture group; PG, placebo group; SG, standard care group; ES, effect size.

Data are absolute number of patients (%); P=statistical significance in Fischer's exact test after Bonferroni adjustment. Effect size calculated as relative risk.
