# Supplementary material for: Effectiveness of Acupuncture for Pain Control After Cesarean Delivery: A Randomized Clinical Trial
Source: PubMed Central journal article supplement (PMC8886541; doi:10.1001/jamanetworkopen.2022.0517), 2022-02-28
Supplement: jamanetwopen-e220517-s003.pdf [file jamanetwopen-e220517-s003.pdf]

## Data Sharing Statement

Usichenko. Effectiveness of Acupuncture for Pain Control After Cesarean Delivery. *JAMA Netw Open*. Published February 28, 2022. doi:10.1001/jamanetworkopen.2022.0517

### Data

**Data available:** No

### Additional Information

**Explanation for why data not available:** on request the anonymized data will be available via email of the corresponding author: [usichent@mcmaster.ca](mailto:usichent@mcmaster.ca)
